# Supplementary material for: Topological Organization of Ventral Tegmental Area Connectivity Revealed by Viral-Genetic Dissection of Input-Output Relations
Source: PubMed Central journal article supplement — Cell Rep. Author manuscript; Available in PMC 2019 Feb 18. (PMC6379204; doi:10.1016/j.celrep.2018.12.040), 2019-01-02
Supplement: NIHMS1517822-supplement-1.pdf [file NIHMS1517822-supplement-1.pdf]

**Cell Reports, Volume 26**

**Supplemental Information**

**Topological Organization of Ventral Tegmental Area  
Connectivity Revealed by Viral-Genetic Dissection  
of Input-Output Relations**

**Kevin T. Beier, Xiaojing J. Gao, Stanley Xie, Katherine E. DeLoach, Robert C. Malenka, and Liqun Luo**

**Supplemental Information:**

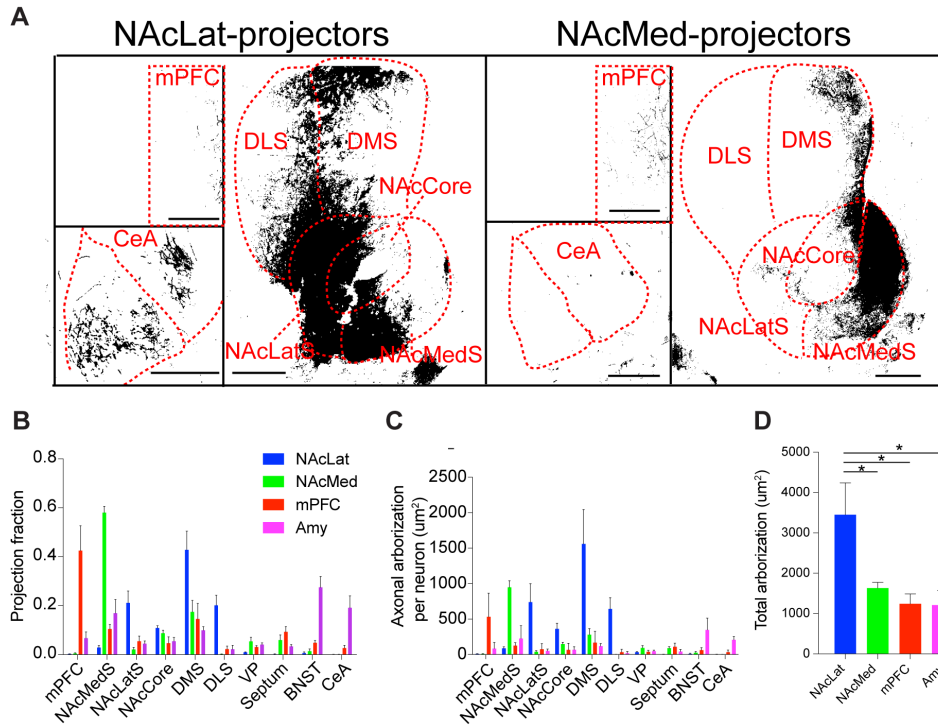

**Figure S1: VTA-DA axon collateralization, including previously published data from NAcLat-projecting and NAcMed-projecting VTA-DA neurons (Beier et al., 2015), shown for comparison purposes.**

(A) Sample images of projections from VTA-DA subpopulations targeted by *CAV-FLEX<sup>loxP</sup>-Flp* injections into the NAcLat and NAcMed. Scale, 500  $\mu\text{m}$ .

(B) Projection fraction of each subtype to ten different brain regions.

(C) Average axonal arborization per labeled VTA-DA neuron in each brain region.

(D) Total quantified arborization for each VTA-DA neuron.

Related to Figure 1. B-D, n=4 for NAcLat and Amy; n=5 for NAcMed and mPFC. Error bars, SEM. \*p < 0.05.

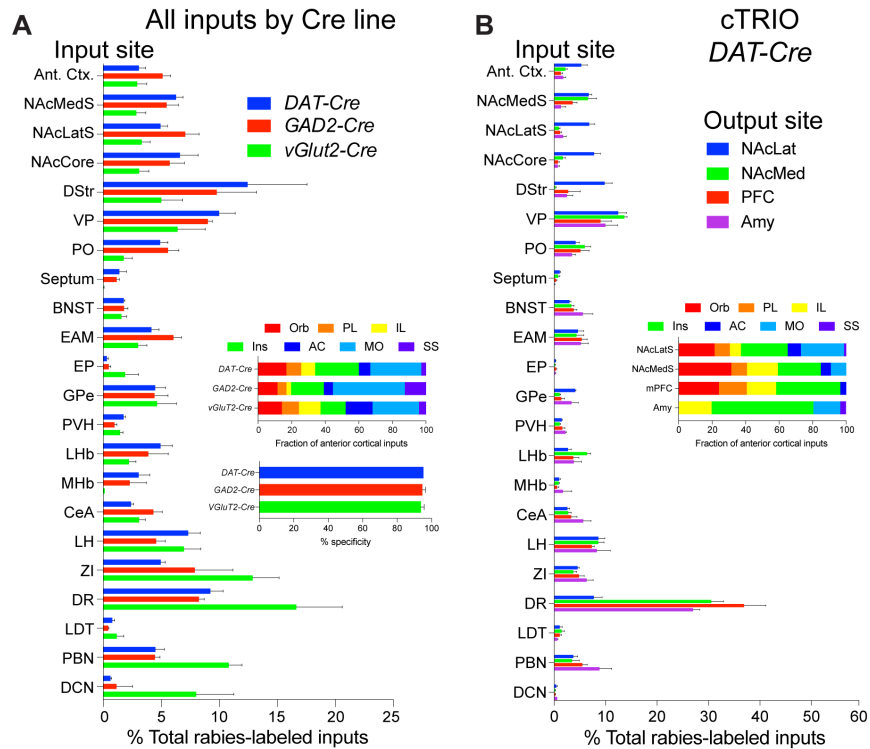

**Figure S2: Input tracing and cTRIO data for *DAT-Cre* mice.**

(A) Quantified percentage of rabies-labeled inputs from one of 22 different input sites throughout the brain, for *DAT-Cre*, *GAD2-Cre*, and *vGluT2-Cre* mouse lines.  $n = 4$  for each condition. The data for *DAT-Cre* and *GAD2-Cre* mice were published previously (Beier et al., 2015) and are shown for comparison purposes. Top inset shows the fraction of anterior cortical inputs from the seven quantified cortical subregions. Bottom inset shows the fidelity of the Cre lines used. *DAT-Cre* fidelity was tested using an anti-TH antibody, whereas *GAD2-Cre* and *vGluT2-Cre* fidelity were tested using in situ hybridization.

(B) cTRIO data for *DAT-Cre* mice, as published previously (Beier et al., 2015), shown here for comparison purposes.

Related to Figure 2.  $n=4$  for each condition. Error bars, SEM.

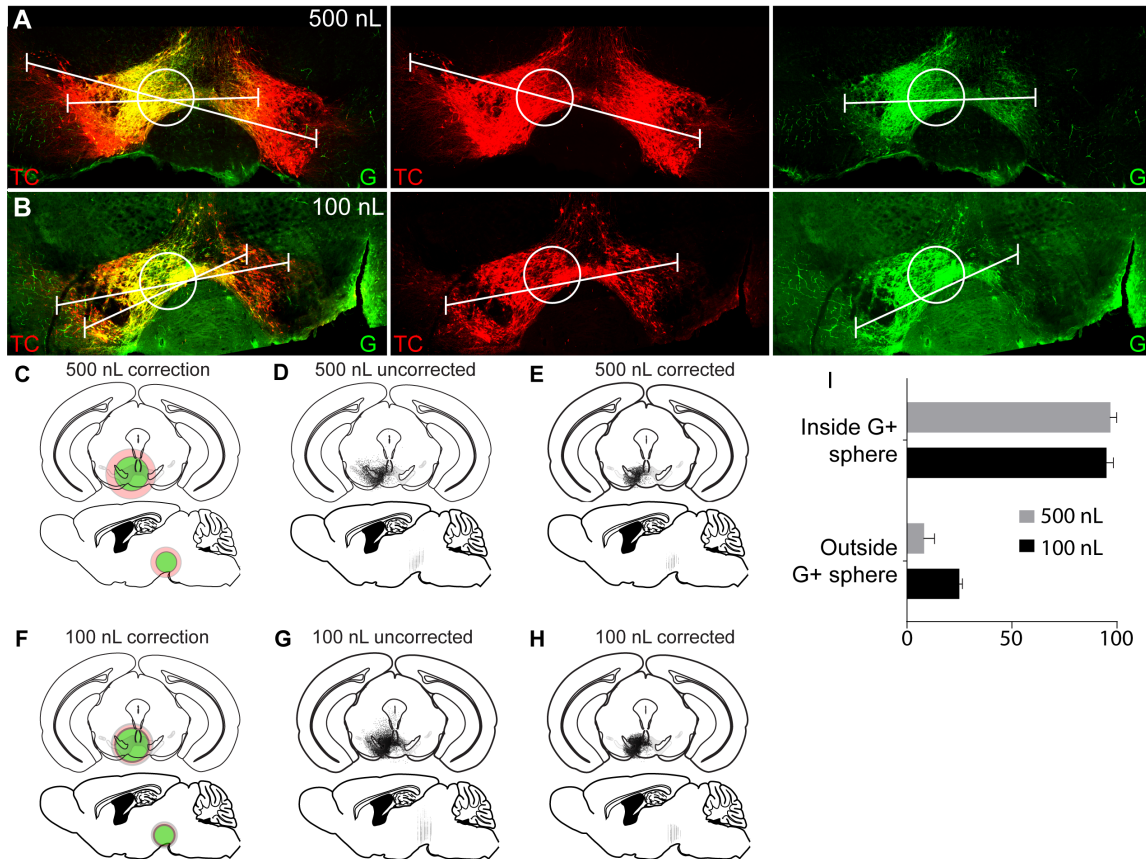

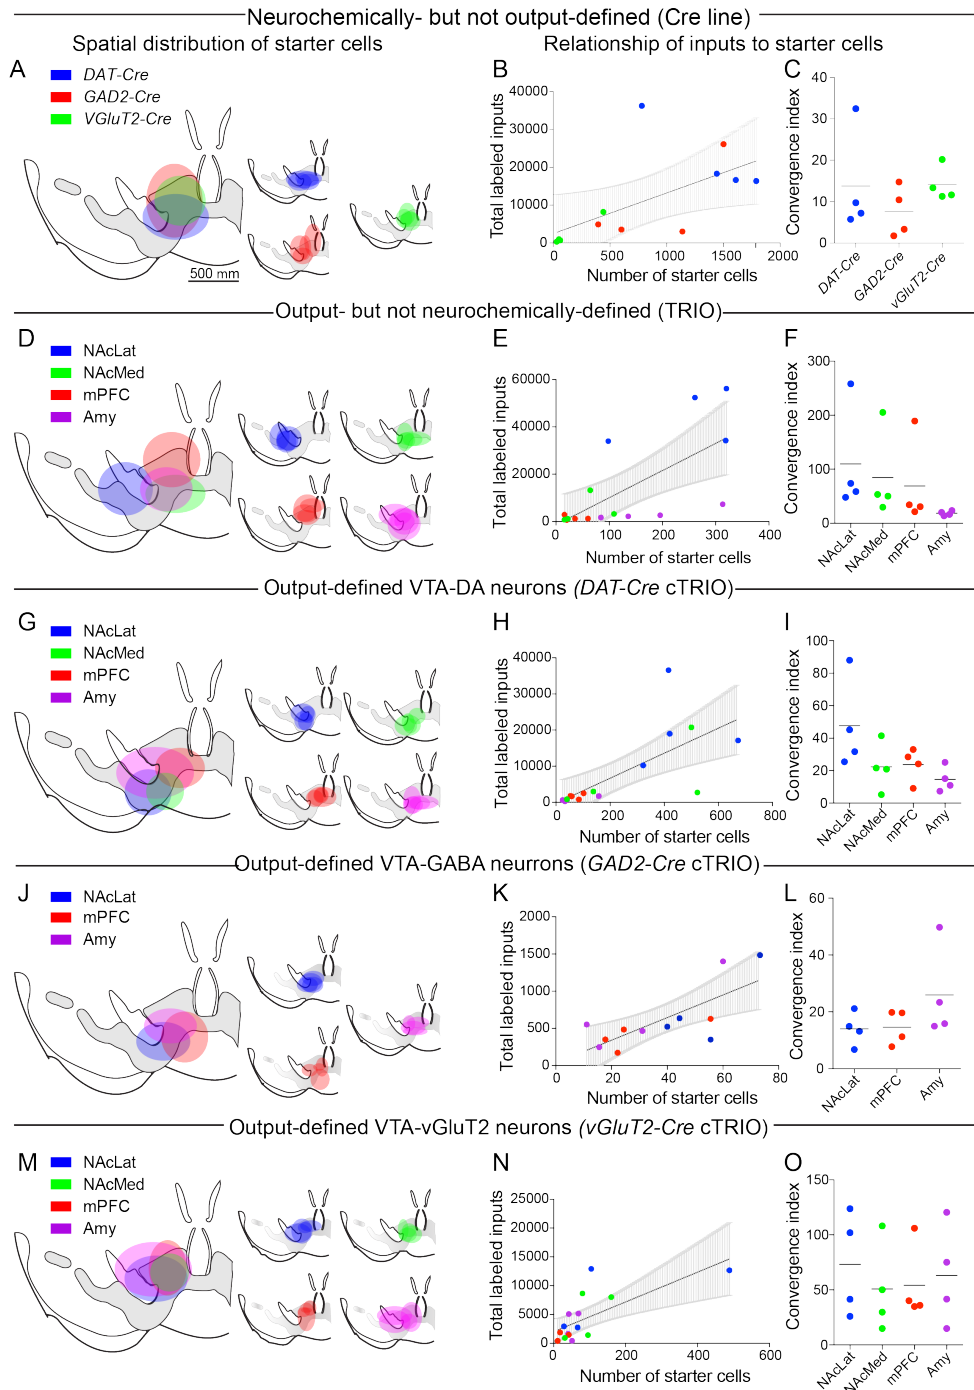

**Figure S4: Starter cell distributions and convergence indices for each brain in the dataset.**

(A) Starter cell distribution in the VTA for neuronal populations defined by Cre driver line. The distribution of starter cells, representing one standard deviation in both X and Y axes, is shown for each experiment on the small midbrain sections on the right. The aggregated data for each condition is shown on the large section to the left.

(B) Total quantified rabies-labeled inputs as a function of starter cells in the VTA. The 95% confidence interval is shown in gray.

(C) The convergence index (inputs per starter cell) for each condition. Similar data are presented for TRIO experiments (D-F), *DAT-Cre* cTRIO (G-I), *GAD2-Cre* cTRIO (J-L), and *vGluT2-Cre* cTRIO (M-O).

Related to Figure 3. n=4 for all conditions.

**Table S1:** Statistical parameters of regression analysis. Related to Figure 3.

**Table S2:** Relative axonal projection and input values obtained using the Allen Mouse Brain Connectivity Atlas and cTRIO for all 20 quantified inputs, as described in Figure 4. Related to Figure 4.

**Table S3:** URLs for all Allen Mouse Brain Connectivity Atlas images analyzed. Related to Figure 4.
